# Supplementary material
Source: PubMed Central journal article supplement (PMC4849822)
Supplement: ASN.2015030252_ASN2015030252SupplementaryData.pdf [file ASN.2015030252_ASN2015030252SupplementaryData.pdf]

**Supplementary Table 1:** Baseline characteristics of included patients by inflammatory status (left) and excluded patients (right).

| Characteristics                                         | INCLUDED       |                  |                 |                           | EXCLUDED        |                       |
|---------------------------------------------------------|----------------|------------------|-----------------|---------------------------|-----------------|-----------------------|
|                                                         | Overall        | Inflammation     | No Inflammation | Inflamed vs. non-Inflamed | Overall         | Excluded vs. Included |
|                                                         | (N=5904)       | (N=3231)         | (N=2673)        | P-value                   | (N=4696)        | P-value               |
| BMI, mean (SD), kg/m <sup>2</sup>                       | 25.9 (5.2)     | 25.8 (5.3)       | 26.0 (4.9)      | 0.2506                    | 25.9 (5.4)      | 0.9617                |
| Serum CRP, median (Q1-Q3), mg/L                         | 7.9 (3.1,19.6) | 18.0 (10.8,34.7) | 3.6 (1.6,6.0)   | NA                        | 10.0 (3.7,30.0) | <0.0001               |
| Serum albumin, mean (SD), g/L                           | 37.4 (4.9)     | 35.2 (5.1)       | 40.0 (2.9)      | NA                        | 35.7 (5.7)      | <0.0001               |
| <b>Patient renal diagnosis classification (Model 1)</b> |                |                  |                 |                           |                 |                       |
| Hypertension/vascular, No. (%)                          | 1014 (17.2)    | 555 (17.2)       | 459 (17.2)      | 0.9954                    | 649 (13.8)      | <0.0001               |
| Glomerulonephritis, No. (%)                             | 526 (8.9)      | 262 (8.1)        | 264 (9.9)       | 0.0176                    | 448 (9.5)       | 0.2641                |
| Diabetic nephropathy, No. (%)                           | 1549 (26.2)    | 870 (26.9)       | 679 (25.4)      | 0.1850                    | 910 (19.4)      | <0.0001               |
| Tubulo-interstitial nephropathy, No. (%)                | 680 (11.5)     | 401 (12.4)       | 279 (10.4)      | 0.0181                    | 450 (9.6)       | 0.0013                |
| Polycystic kidney disease, No. (%)                      | 315 (5.3)      | 119 (3.7)        | 196 (7.3)       | <0.0001                   | 233 (5.0)       | 0.3880                |
| Unknown renal diagnosis, No. (%)                        | 1820 (30.8)    | 1024 (31.7)      | 796 (29.8)      | 0.1130                    | 2006 (42.7)     | <0.0001               |
| <b>Demographics and medical history (Model 1)</b>       |                |                  |                 |                           |                 |                       |
| Age, mean (SD), years                                   | 64.6 (14.6)    | 66.9 (13.4)      | 61.9 (15.4)     | <0.0001                   | 64.2 (15.3)     | 0.1564                |
| Sex, male, No. (%)                                      | 3559 (60.3)    | 1954 (60.5)      | 1605 (60.0)     | 0.7358                    | 2818 (60.0)     | 0.7758                |
| Cohort entry-year 2007, No. (%)                         | 1220 (20.7)    | 646 (20.0)       | 574 (21.5)      | 0.1621                    | 826 (17.6)      | <0.0001               |
| Cohort entry-year 2008, No. (%)                         | 2024 (34.3)    | 1049 (32.5)      | 975 (36.5)      | 0.0012                    | 1622 (34.5)     | 0.7810                |
| Cohort entry-year 2009, No. (%)                         | 2660 (45.1)    | 1536 (47.5)      | 1124 (42.1)     | <0.0001                   | 2248 (47.9)     | 0.0039                |
| Western Europe No. (%)                                  | 3328 (56.4)    | 1749 (54.1)      | 1579 (59.1)     | 0.0001                    | 3324 (70.8)     | <0.0001               |

|                                                        |               |                |               |         |               |         |
|--------------------------------------------------------|---------------|----------------|---------------|---------|---------------|---------|
| Non-smoker, No. (%)                                    | 2352 (39.8)   | 1253 (38.8)    | 1099 (41.1)   | 0.0682  | 1670 (35.6)   | <0.0001 |
| Former smoker, No. (%)                                 | 1101 (18.6)   | 674 (20.9)     | 427 (16.0)    | <0.0001 | 670 (14.3)    | <0.0001 |
| Current smoker, No. (%)                                | 481 (8.1)     | 260 (8.0)      | 221 (8.3)     | 0.7575  | 295 (6.3)     | 0.0003  |
| Missing smoking data, No. (%)                          | 1970 (33.4)   | 1044 (32.3)    | 926 (34.6)    | 0.0587  | 2061 (43.9)   | <0.0001 |
| Diabetes <sup>a</sup> , No. (%)                        | 2233 (37.8)   | 1260 (39.0)    | 973 (36.4)    | 0.0406  | 1479 (31.5)   | <0.0001 |
| Cardiovascular disease <sup>a</sup> , No. (%)          | 2185 (37.0)   | 1266 (39.2)    | 919 (34.4)    | 0.0001  | 1387 (29.5)   | <0.0001 |
| Cancer <sup>a</sup> , No. (%)                          | 519 (8.8)     | 346 (10.7)     | 173 (6.5)     | <0.0001 | 366 (7.8)     | 0.0653  |
| <b>Modifiable factors added in Model 2</b>             |               |                |               |         |               |         |
| Hospitalization <sup>b</sup> , No. (%)                 | 1285 (21.8)   | 910 (28.2)     | 375 (14.0)    | <0.0001 | 1231 (26.2)   | <0.0001 |
| Catheter use <sup>c</sup> , No. (%)                    | 2606 (44.1)   | 1663 (51.5)    | 943 (35.3)    | <0.0001 | 2432 (51.8)   | <0.0001 |
| Kt/V, mean (SD)                                        | 1.28 (0.63)   | 1.27 (0.29)    | 1.30 (0.88)   | 0.1346  | 1.26 (0.29)   | 0.0038  |
| Mean blood flow, mean (SD), ml/min                     | 304 (152)     | 301 (199)      | 306 (62)      | 0.2389  | 298 (89)      | 0.0302  |
| Systolic blood pressure <sup>d</sup> , mean (SD), mmHg | 137 (17)      | 136 (18)       | 137 (17)      | 0.0333  | 137 (19)      | 0.2305  |
| <b>Additional Laboratory parameters</b>                |               |                |               |         |               |         |
| Hemoglobin, mean (SD), g/L                             | 108 (14)      | 105 (14)       | 111 (13)      | <0.0001 | 105 (15)      | <0.0001 |
| Serum creatinine, mean (SD), μmol/L                    | 562 (184)     | 539 (174)      | 589 (192)     | <0.0001 | 570 (200)     | 0.0325  |
| Serum cholesterol, mean (SD), mmol/L                   | 4.39 (1.10)   | 4.35 (1.15)    | 4.43 (1.04)   | 0.0108  | 4.28 (1.15)   | 0.0001  |
| Serum LDL-cholesterol, mean (SD), mmol/L               | 2.49 (0.91)   | 2.50 (0.93)    | 2.47 (0.88)   | 0.2156  | 2.45 (0.94)   | 0.1481  |
| Serum calcium, mean (SD), mmol/L                       | 2.18 (0.17)   | 2.16 (0.17)    | 2.21 (0.16)   | <0.0001 | 2.19 (0.19)   | 0.1234  |
| Serum phosphate, mean (SD), mmol/L                     | 1.53 (0.40)   | 1.49 (0.41)    | 1.57 (0.39)   | <0.0001 | 1.48 (0.47)   | <0.0001 |
| Serum intact PTH, median (Q1-Q3), ng/L                 | 216 (121,362) | 207 (114,343)  | 224 (128,385) | <0.0001 | 214 (116,372) | 0.9076  |
| Serum ferritin, median (Q1-Q3), μg/L                   | 562 (308,976) | 637 (346,1076) | 489 (270,856) | <0.0001 | 574 (315,995) | 0.3470  |

---

Abbreviations; BMI; body mass index, CRP; C-reactive protein, NA; not applicable, LDL; low-density cholesterol, PTH; parathyroid hormone

<sup>a</sup>; prior to end of baseline

<sup>b</sup>; during the baseline period

<sup>c</sup>; during first 3 months, missing data in 958 patients

<sup>d</sup>; pre-dialysis value

---

**Supplementary Table 2:** All cause, cardiovascular and non-cardiovascular mortality rates per 100 person-years in included patients by inflammatory status and excluded patients.

| Event                      | Included            |                          |                             | Excluded (N=4696)   |
|----------------------------|---------------------|--------------------------|-----------------------------|---------------------|
|                            | Overall<br>(N=5904) | Inflammation<br>(N=3231) | No Inflammation<br>(N=2673) |                     |
| <i>All-cause mortality</i> |                     |                          |                             |                     |
| Event patients             | 1929                | 1334                     | 595                         | 1531                |
| PY (sum)                   | 16513.49            | 8446.96                  | 8066.52                     | 9802.47             |
| PY (median [Q1, Q3])       | 3.01 [1.27,4.06]    | 2.64 [1.08,3.90]         | 3.30 [1.61,4.27]            | 1.69 [0.36,3.64]    |
| Rate [95% CI]              | 11.68 [11.17-12.21] | 15.79 [14.96-16.66]      | 7.38 [6.80-7.99]            | 15.62 [14.85-16.42] |
| <i>CV mortality</i>        |                     |                          |                             |                     |
| Patients                   | 822                 | 550                      | 272                         | 585                 |
| PY (sum)                   | 16513.49            | 8446.96                  | 8066.52                     | 9802.47             |
| PY (median [Q1, Q3])       | 3.01 [1.27,4.06]    | 2.64 [1.08,3.90]         | 3.30 [1.61,4.27]            | 1.69 [0.36,3.64]    |
| Rate [95% CI]              | 4.98 [4.64-5.33]    | 6.51 [5.98-7.08]         | 3.37 [2.98-3.8]             | 5.97 [5.49-6.47]    |
| <i>Non-CV mortality</i>    |                     |                          |                             |                     |
| Patients                   | 1107                | 784                      | 323                         | 946                 |
| PY (sum)                   | 16513.49            | 8446.96                  | 8066.52                     | 9802.47             |
| PY (median [Q1, Q3])       | 3.01 [1.27,4.06]    | 2.64 [1.08,3.90]         | 3.30 [1.61,4.27]            | 1.69 [0.36,3.64]    |
| Rate [95% CI]              | 6.70 [6.31-7.11]    | 9.28 [8.64-9.95]         | 4.00 [3.58-4.47]            | 9.65 [9.05-10.29]   |

Abbreviations; PY; person years, Q1; quintile 1, Q3; quintile 3, CI; confidence interval

**Supplementary Table 3:** All-cause mortality by baseline BMI-Inflammation: Cox proportional hazards analysis

| Model | BMI quintile | Hazard Ratio [95% Confidence Interval] |                     |
|-------|--------------|----------------------------------------|---------------------|
|       |              | Inflammation Present                   | Inflammation Absent |
| 0     | 1            | 3.13 [2.52-3.89]                       | 1.13 [0.86-1.48]    |
|       | 2            | 2.63 [2.11-3.29]                       | 1.19 [0.92-1.54]    |
|       | 3            | 2.31 [1.85-2.89]                       | 1.05 [0.81-1.36]    |
|       | 4            | 2.32 [1.86-2.90]                       | 1.19 [0.93-1.53]    |
|       | 5            | 1.79 [1.42-2.25]                       | 1                   |
| 1     | 1            | 2.88 [2.31-3.59]                       | 1.32 [1.01-1.74]    |
|       | 2            | 2.19 [1.74-2.74]                       | 1.21 [0.94-1.57]    |
|       | 3            | 2.05 [1.63-2.57]                       | 1.02 [0.79-1.33]    |
|       | 4            | 1.90 [1.52-2.37]                       | 1.12 [0.87-1.44]    |
|       | 5            | 1.59 [1.26-2.00]                       | 1                   |
| 2     | 1            | 2.68 [2.14-3.35]                       | 1.34 [1.02-1.77]    |
|       | 2            | 2.07 [1.65-2.60]                       | 1.22 [0.94-1.59]    |
|       | 3            | 1.96 [1.56-2.46]                       | 1.03 [0.79-1.34]    |
|       | 4            | 1.80 [1.44-2.26]                       | 1.17 [0.91-1.50]    |
|       | 5            | 1.50 [1.19-1.89]                       | 1                   |

Model 0: non-adjusted.

Model 1: adjusted for demographics and medical history: age, gender, region (western or eastern Europe), dialysis vintage, smoking status, CKD etiology, diabetes, CVD and cancer history.

Model 2: Model 1 plus adjustment for modifiable factors: hospitalization, catheter use, Kt/V, actual blood flow and systolic blood pressure.

**Supplementary Table 4:** A sensitivity Cox proportional hazards analysis (unadjusted time-updated all-cause mortality) where inflammation was defined by CRP  $\geq 10$  mg/L or serum albumin  $\leq 35$  g/L alone.

| BMI quintile | Hazard Ratios [95% Confidence Intervals] |                     |                      |                      |                      |                     |
|--------------|------------------------------------------|---------------------|----------------------|----------------------|----------------------|---------------------|
|              | Main analysis                            |                     |                      | Sensitivity analysis |                      |                     |
|              | CRP & serum albumin                      |                     | CRP alone            |                      | Serum albumin alone  |                     |
|              | Inflammation present                     | Inflammation absent | Inflammation present | Inflammation absent  | Inflammation present | Inflammation absent |
| 1            | 10.83 [8.22-14.26]                       | 1.51 [1.06-2.14]    | 9.65 [7.57-12.29]    | 2.13 [1.62-2.79]     | 10.52 [8.64-12.81]   | 2.02 [1.62-2.52]    |
| 2            | 7.21 [5.43-9.57]                         | 0.95 [0.66-1.39]    | 6.67 [5.19-8.59]     | 1.15 [0.85-1.56]     | 7.39 [5.95-9.17]     | 1.31 [1.04-1.66]    |
| 3            | 5.03 [3.76-6.72]                         | 1.04 [0.73-1.49]    | 4.42 [3.40-5.75]     | 1.10 [0.82-1.48]     | 5.31 [4.19-6.73]     | 1.33 [1.06-1.66]    |
| 4            | 3.67 [2.72-4.95]                         | 0.97 [0.68-1.40]    | 3.13 [2.38-4.10]     | 0.93 [0.68-1.27]     | 4.28 [3.32-5.52]     | 1.09 [0.87-1.38]    |
| 5            | 2.96 [2.19-4.01]                         | 1                   | 2.47 [1.88-3.26]     | 1                    | 3.58 [2.75-4.67]     | 1                   |

**Supplementary Table 5:** Cause-specific non-cardiovascular deaths based on ICD-10 codes among the inflamed and non-inflamed patient groups.

| BMI quintile | Cause of death  | Inflammation status |            | Total       |
|--------------|-----------------|---------------------|------------|-------------|
|              |                 | Present             | Absent     |             |
| 1            | Cancer          | 31 (16.4)           | 4 (7.1)    | 35          |
|              | Infections      | 36 (19.0)           | 8 (14.3)   | 44          |
|              | Other           | 57 (30.2)           | 22 (39.3)  | 79          |
|              | Missing/invalid | 65 (34.4)           | 22 (39.3)  | 87          |
| 2            | Cancer          | 21 (13.0)           | 10 (14.3)  | 31          |
|              | Infections      | 39 (24.1)           | 10 (14.3)  | 49          |
|              | Other           | 45 (27.8)           | 21 (30.0)  | 66          |
|              | Missing/invalid | 57 (35.2)           | 29 (41.4)  | 86          |
| 3            | Cancer          | 26 (19.3)           | 8 (11.4)   | 34          |
|              | Infections      | 25 (18.5)           | 11 (15.7)  | 36          |
|              | Other           | 38 (28.1)           | 27 (38.6)  | 65          |
|              | Missing/invalid | 46 (34.1)           | 24 (34.3)  | 70          |
| 4            | Cancer          | 17 (9.9)            | 8 (11.6)   | 25          |
|              | Infections      | 32 (18.7)           | 20 (29.0)  | 52          |
|              | Other           | 61 (35.7)           | 15 (21.7)  | 76          |
|              | Missing/invalid | 61 (35.7)           | 26 (37.7)  | 87          |
| 5            | Cancer          | 13 (10.2)           | 4 (6.9)    | 17          |
|              | Infections      | 28 (22.0)           | 13 (22.4)  | 41          |
|              | Other           | 50 (39.4)           | 26 (44.8)  | 76          |
|              | Missing/invalid | 36 (28.3)           | 15 (25.9)  | 51          |
| <b>Total</b> |                 | <b>784</b>          | <b>323</b> | <b>1107</b> |

Abbreviation; ICD; international classification of diseases

Supplementary Figure 1:

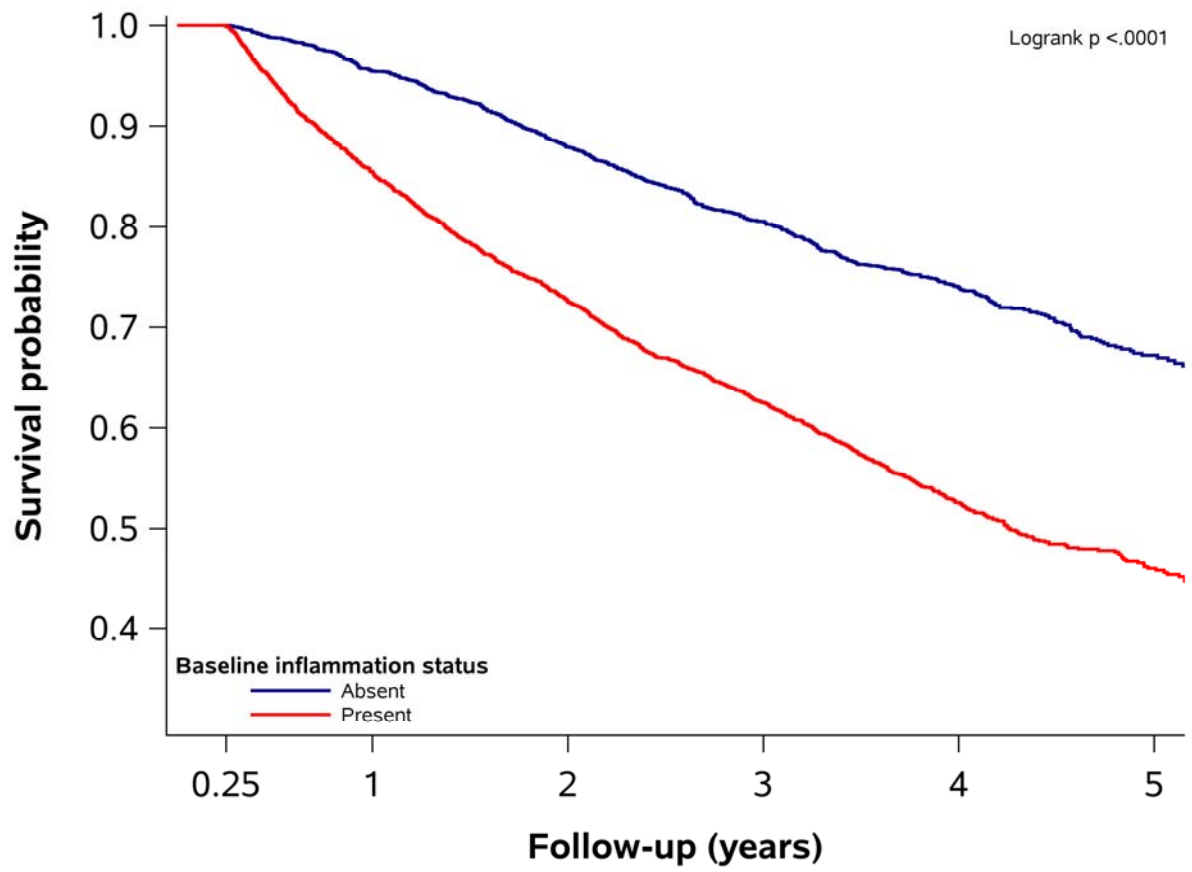



Supplementary Figure 2:

2A.

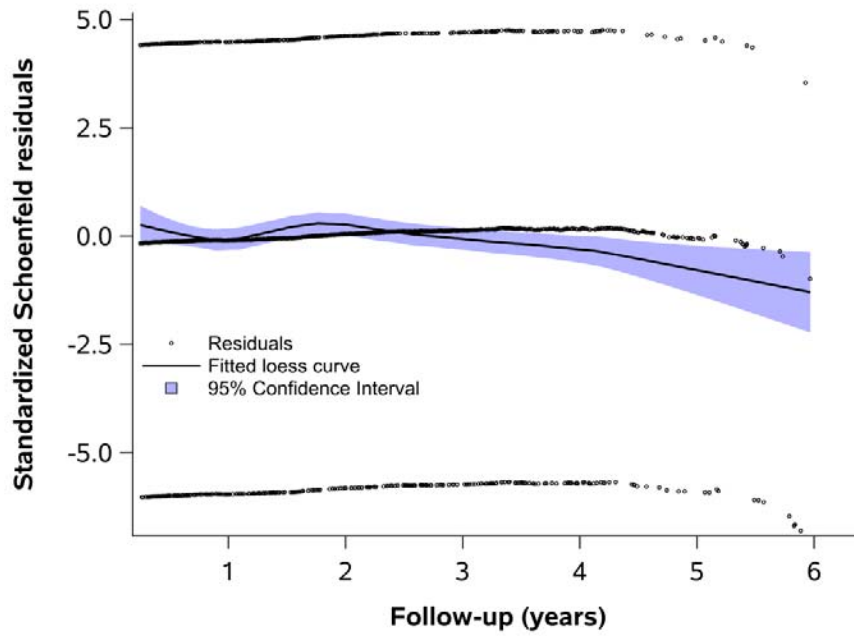

2B.

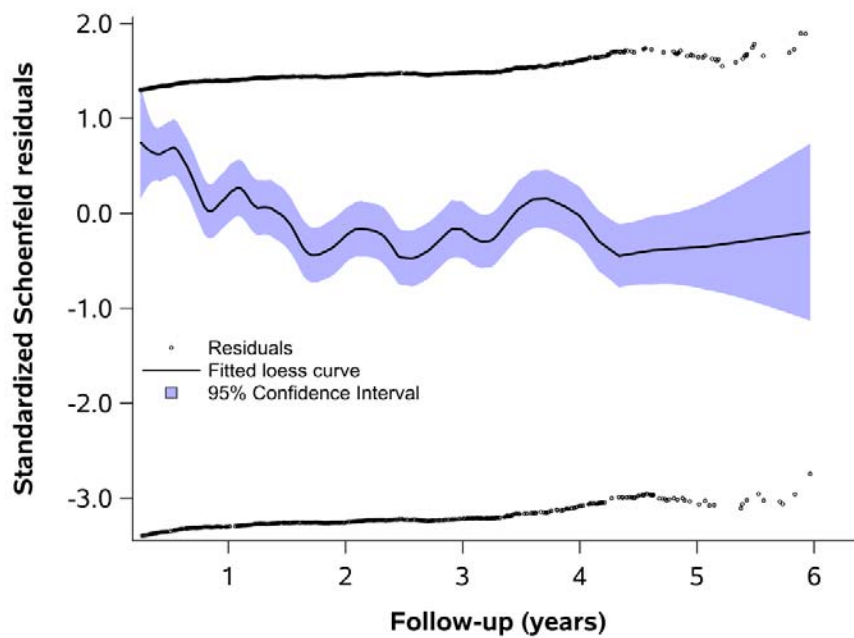

Supplementary Figure 3:

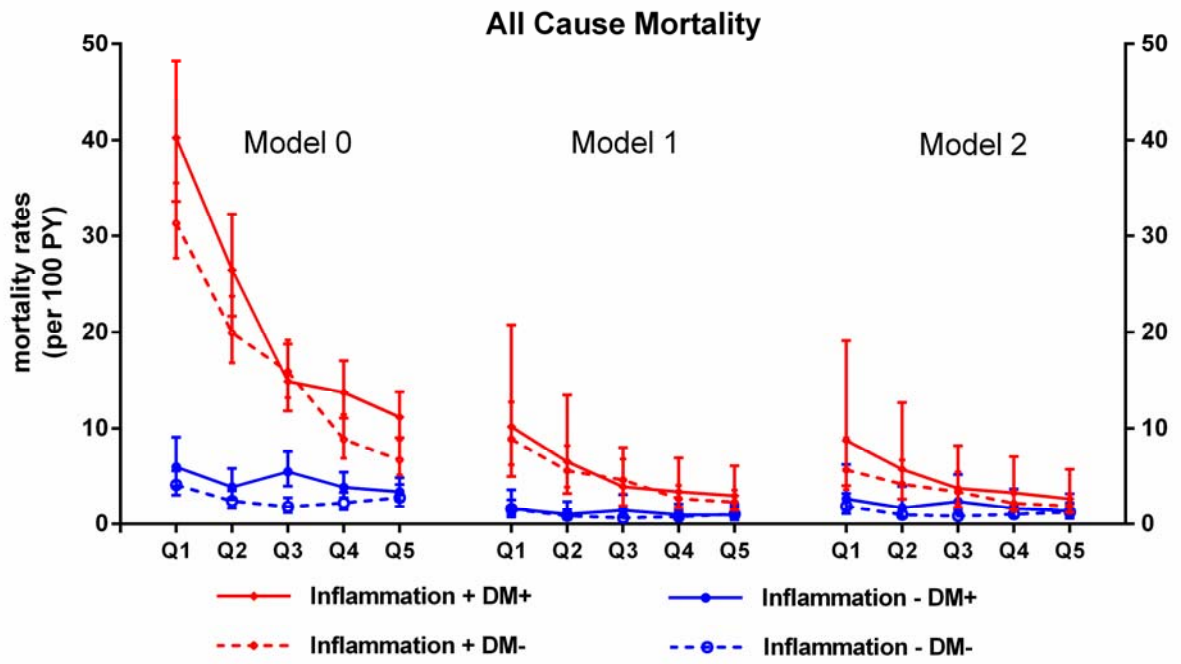

Supplementary Figure 4:

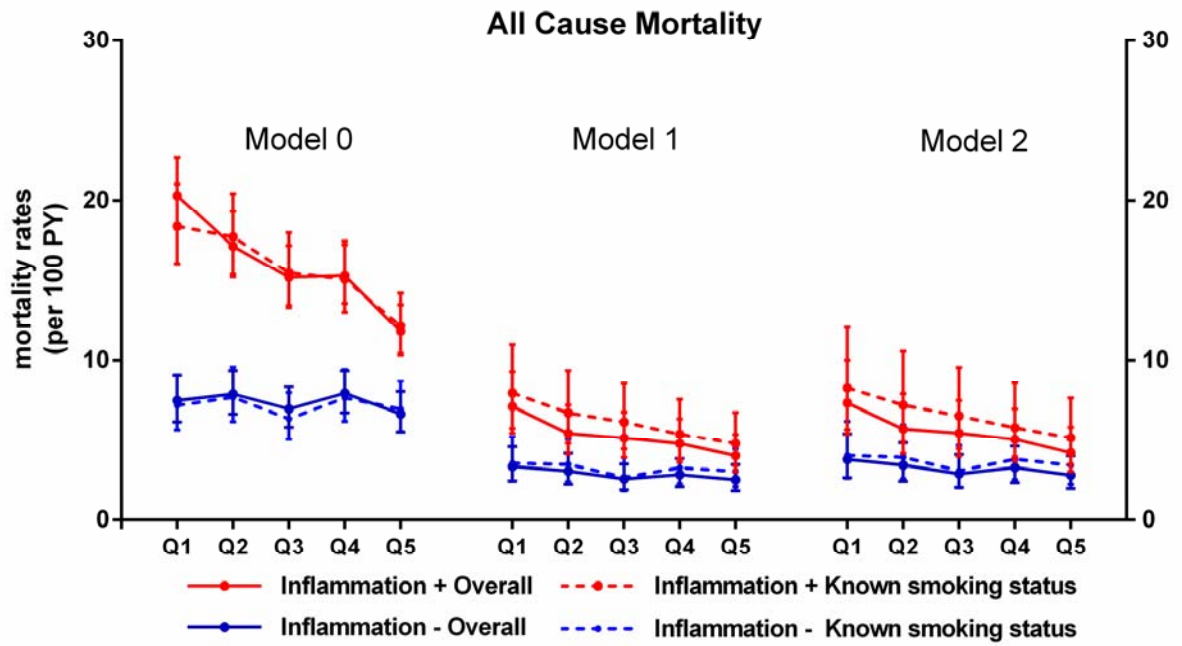

Supplementary Figure 5:

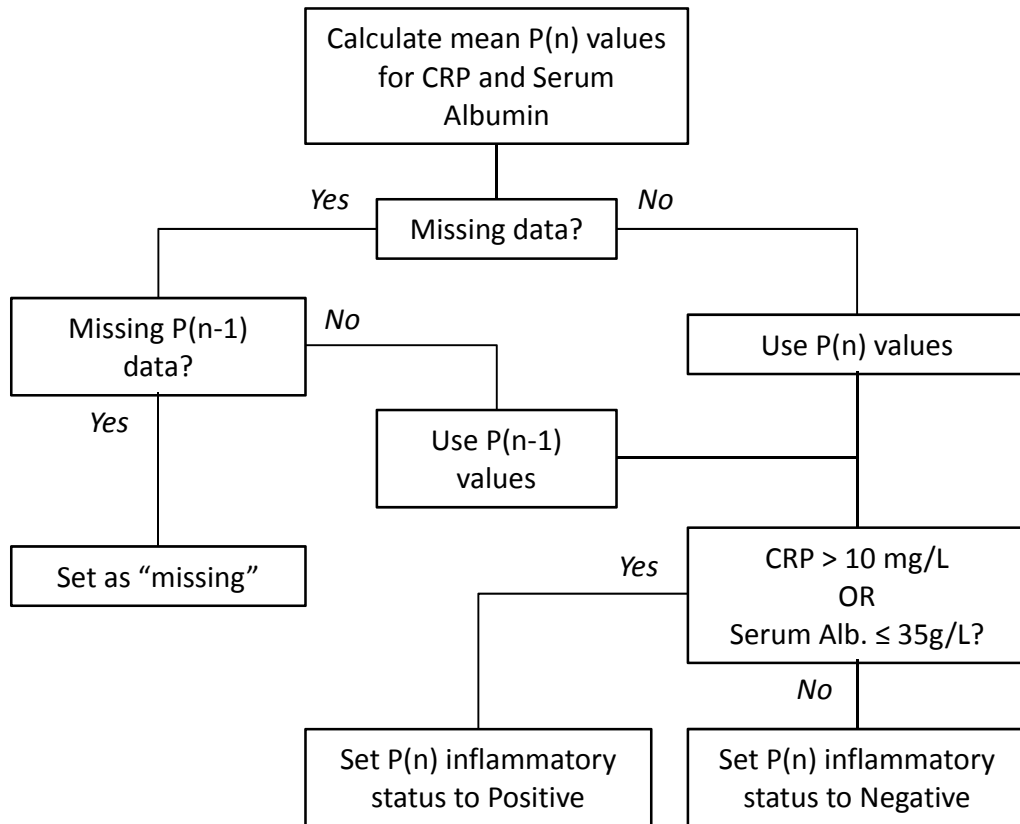

**Legend to Supplemental Figures:**

**Figure 1:** Kaplan Meier curves showing all-cause mortality by basal inflammation status.

**Figure 2:** Proportional hazards assumption for BMI (top) and inflammation (bottom).

**Figure 3:** All-cause mortality with and without the presence of diabetes mellitus in an unadjusted model (Model 0), following adjustment for demographics and medical history (Model 1) and following additional adjustment for modifiable factors (Model 2).

**Figure 4:** All-cause mortality with and without known smoking status in an unadjusted model (Model 0), following adjustment for demographics and medical history (Model 1) and following additional adjustment for modifiable factors (Model 2).

Figure 5: Algorithm to allocate inflammation status for time-updated analyses in case of missing data.

## **Supplementary appendix: ARO Research Initiative Study Collaborators and Sponsors.**

### *ARO Steering Committee members:*

Prof P. Aljama, MD, Reina Sofia University Hospital, Cordoba, Spain  
Prof S. D. Anker, MD, Innovative Clinical Trials, University Medical Centre, Göttingen, Germany  
Prof T. B. Drueke, MD, Inserm Unit 1018, Hôpital Paul Brousse and Université Paris-Sud, Villejuif, France  
Prof K.-U. Eckardt (co-chair), MD, University of Erlangen-Nürnberg, Germany  
Prof J. Floege (chair), MD, RWTH University of Aachen, Aachen, Germany  
Prof A. de Francisco, MD, Hospital Universitario Valdecilla, Universidad de Cantabria, Santander, Spain  
Prof F. Kronenberg, MD, Medical University of Innsbruck, Innsbruck, Austria  
Prof I. C. Macdougall, MD, King's College Hospital, London, UK  
Prof J. Malyszko, MD, Medical University, Bialystok, Poland  
Prof G. Schernthaner, MD, Rudolfstiftung Hospital, Vienna, Austria  
Prof P. Stenvinkel, MD, Karolinska Institutet, Stockholm, Sweden  
Prof D. C. Wheeler, MD, Division of Medicine, University College London, London, UK.

### *ARO project collaborators:*

Dr. B Canaud, MD, Fresenius Medical Care (FMC), Bad Homburg, Germany  
Dr. B Molemans, MD, Amgen Europe GmbH, Zug, Switzerland  
Mr. C. Erhard, MSc, Center for Observational Research (CfOR), Amgen Ltd, Uxbridge, UK  
Mrs. S. Richards, MSc, Global Biostatistical Science, Amgen Ltd, Uxbridge, UK

**Additional Contributions to ARO:** We are grateful to the participating FMC centers for collecting the data.

**Role of the Sponsors:** The sponsors were responsible for data collection (FMC) and data management (FMC, Amgen), provided resources for statistical and epidemiological analysis, and participated in the interpretation of data and preparation of the manuscript (Amgen). Every step of development of the project, from design and scientific conduct of the study, through interpretation of the data, to preparation, review, and approval of the manuscript, was led by authors who are also members of the ARO Steering Committee. Results and their interpretations were discussed by all members of the ARO Steering Committee at plenary meetings twice a year.
